# Supplementary material
Source: PubMed Central journal article supplement (PMC5001162)
Supplement: NIHMS802232-supplement-Supplemental.pdf [file NIHMS802232-supplement-Supplemental.pdf]

**A**

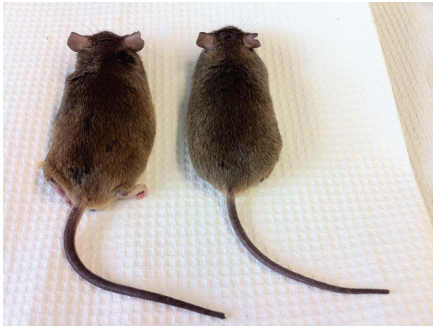

**B**

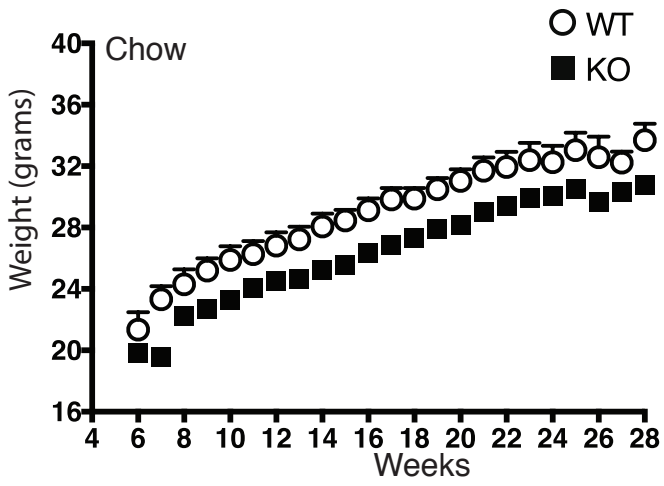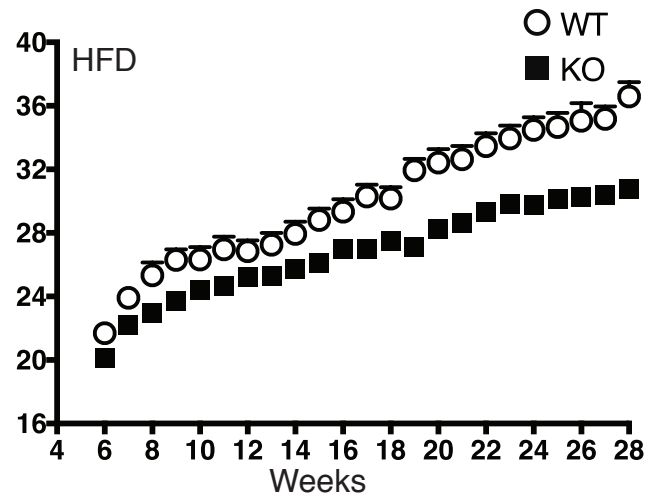

**A**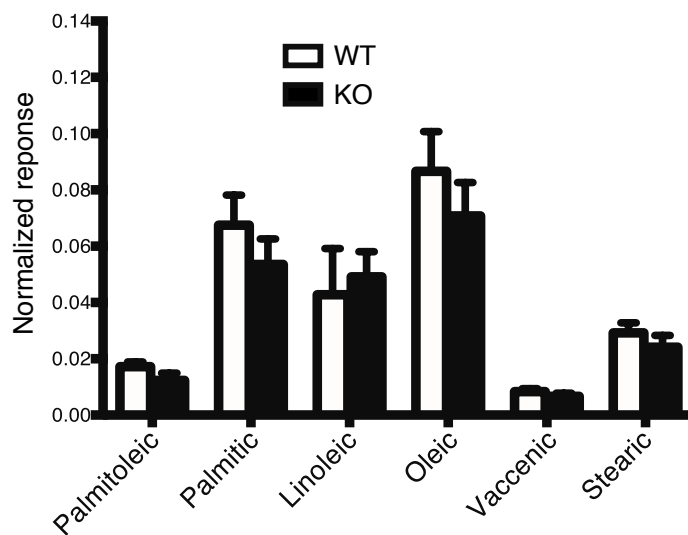**B**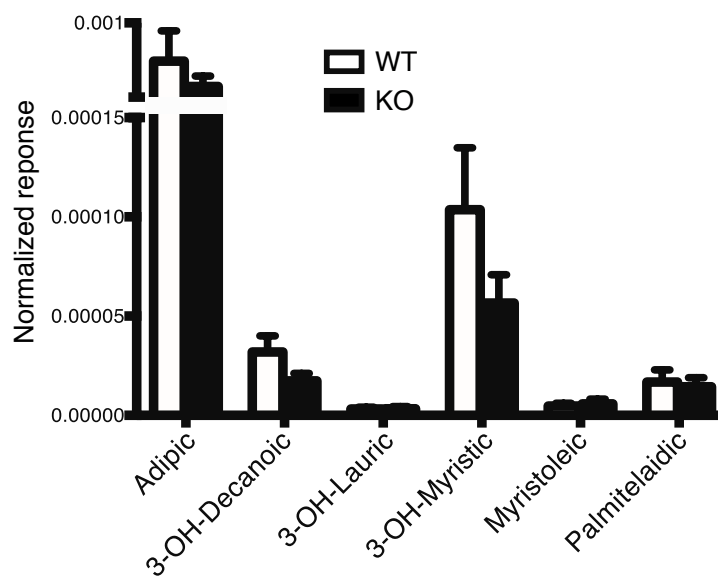**C**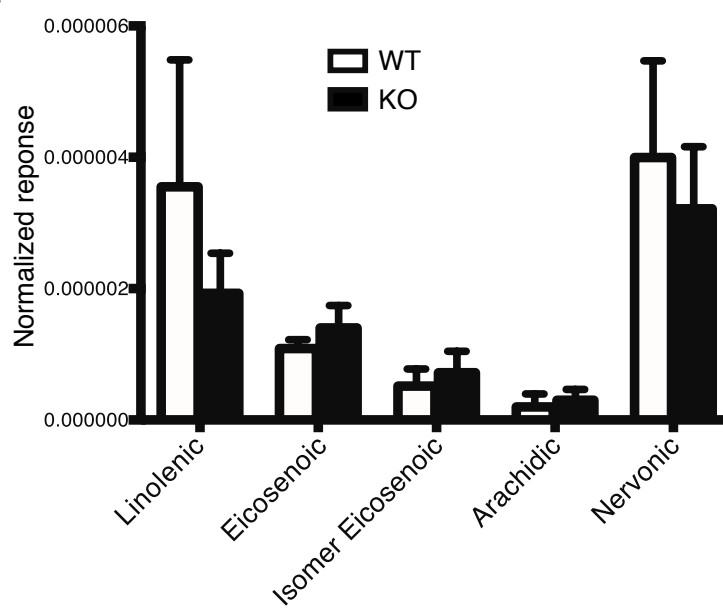

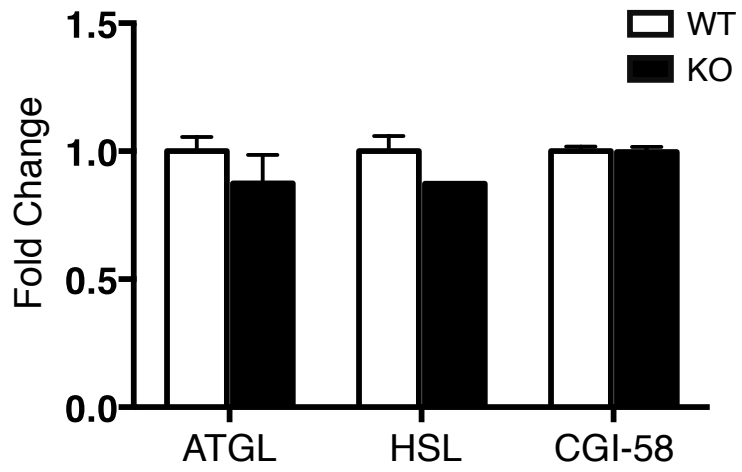

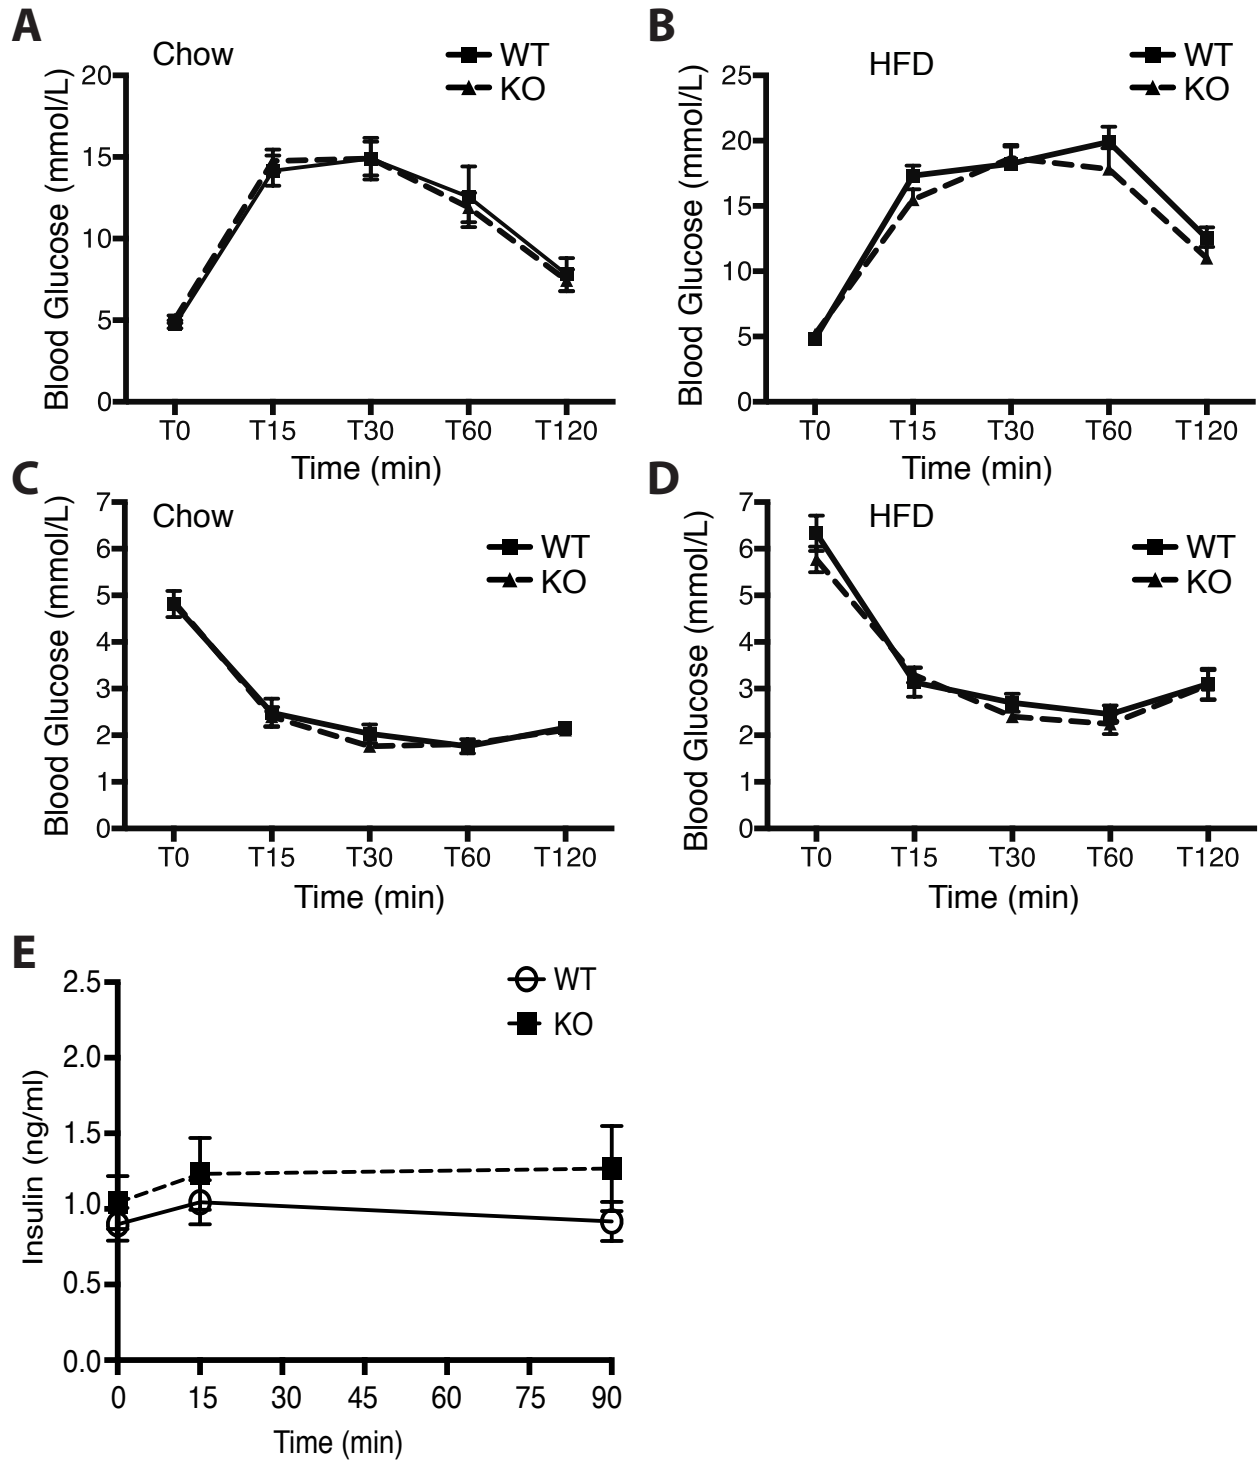

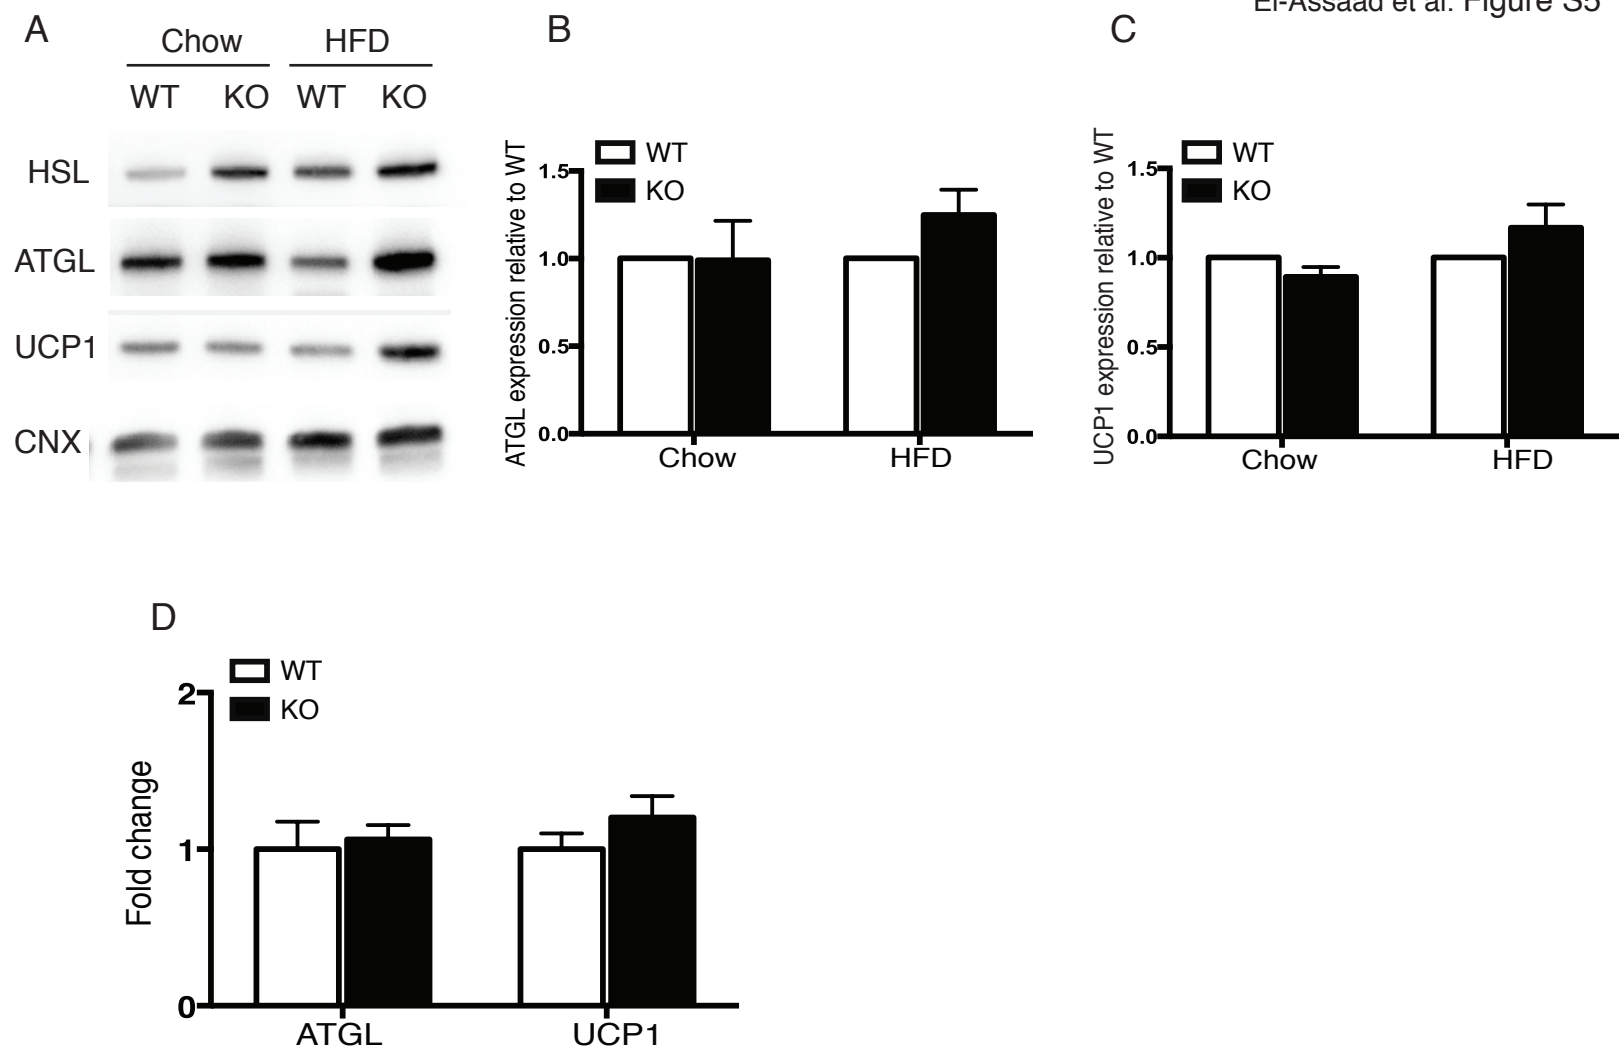

Table S1 quantitative RT-PCR primers

| Gene           | Primer (Forward)          | Primer (Reverse)         |
|----------------|---------------------------|--------------------------|
| G0S2           | GCTCAGATGGAAAGTGTGCAG     | TGGCGGCTGTGAAAGGGCTGC    |
| PPAR $\gamma$  | CCAGAGCATGGTGCCTTCGCT     | CAGCAACCATTGGGTCAGCTC    |
| Fatp1          | CGCTTTCTGCGTATCGTCTGCAAG  | AAGATGCACGGGATCGTGTCT    |
| L-Fabp4        | GGGAAGAAAATCAAACCTCACCATC | AGTTGTCACCATTTTATTGTCACC |
| SCD1           | AGCTGGTGTATGTTCCAGAGG     | TGAGCACCAGAGTGTATCGC     |
| Acadm          | ACTTCGTGGCTTCGTCTAGA      | GAGCAGGTTTCAAGATCGCA     |
| Acadl          | TTTCCGGGAGAGTGTAAAGGA     | ACTTCTCCAGCTTTCTCCCA     |
| SREBP1c        | ACGGAGCCATGGATTGCACATTTG  | AGGCTGTAGGATGGTGTAGTGG   |
| Cidea          | TGCTCTTCTGTATCGCCCAGT     | GCCGTGTTAAGGAATCTGCTG    |
| Elovl3         | TCCGCGTTCTCATGTAGGTCT     | GGACCTGATGCAACCCTATGA    |
| PGC-1 $\alpha$ | CCCTGCCATTGTTAAGACC       | TGCTGCTGTTCTCTGTTTTC     |
| UCP1           | ACTGCCACACCTCCAGTCATT     | CTTTGCCTCACTCAGGATTGG    |
| ECH1           | GGTCAGCCGCGTGTTCCAAGATA   | GTAGTCAAGGCTCTCGTCCACAG  |
| Cox8b          | CATAGTCGTTGGCTTCATGGTTC   | GGCAGATGGACATGTTTAATGAA  |
| Tfam           | GCTGCCAGGCTTTCTAGATGAA    | TTCTATGCAAGAAAAACCTATGC  |
| DiO2           | GCAGTTAGGACTGAAGTGTTAGT   | TACATGCCTCAATGCTGATGCTG  |
| phyH           | CGAGTACAGCCTGAGCTACACAG   | TGATAAAAAGAGAACATCATCTC  |
| HSL            | CAGCGGTAGAGAATAGCATCATC   | CTCTGCTCTCGTCATGTCACCTG  |
| CGI-58         | TGTGCAGGACTCTTACTTGGCAGT  | GTTTCTTTGGGCAGACCGGTTTCT |
| C/EBP $\beta$  | GCAAGAGCCGCGACAAG         | GGCTCGGGCAGCTGCTT        |
| C/EBP $\alpha$ | GAACAGCAACGAGTACCGGGTA    | GCCATGGCCTTGACCAAGGAG    |
| Perilipin A    | GGCCTGGACGACAAAACC        | CAGGATGGGCTCCATGAC       |
| ATGL           | GAGACCAAGTGGAACATC        | GTAGATGTGAGTGGCGTT       |

## Supplementary methods

*Generation of G0S2-knockout mice* To generate G0S2-deficient mice, we screened a mouse 129S6/SvEv BAC library (RPCI-22, Taconic). G0S2-positive clones were mapped using restriction enzyme digestion and sequencing. Approximately 9kb of mouse genomic DNA was inserted into pBS and a HindIII/Xho1 fragment containing the coding exon (exon 2 encodes the entire open reading frame) of G0S2 was excised and replaced by a Neo cassette. The TK negative selection marker was then added and the 9kb construct linearized by Asp718 digestion followed by electroporation of AB2.2 embryonic stem (ES) cells. A schematic of the targeting strategy is shown in figure 1A. Following selection, ES clones were screened by Southern blotting with a mouse G0S2-specific probe and targeted ES clones injected into C57BL/6 blastocysts. Germline transmission of the targeted allele was confirmed by Southern blotting. Primers used for genotyping are AAGAACGCCAAAGCCAGTC and CTTGATTGCTCGCACAGCCT for wildtype gene and CTGCTAAAGCGCATGCTC and CATCAGGCTATCTTCTTGGC for knockout gene.

*Real Time Quantitative PCR analysis* Total RNAs were extracted either from adipocytes using the RNeasy lipid tissue mini kit or from liver tissues using the Allprep DNA/RNA/Protein kit (Qiagen). 1ug RNA was reverse-transcribed to cDNA (QuantiTect Reverse Transcription Kit, Qiagen). Primers used are listed in Supplemental table 1. QRT-PCR analysis was performed on the Eppendorf realplex using the QuantiTect SYBR Green (Qiagen). Gene expression analysis was determined using the delta CT method and normalized to cyclophilin.

*Tolerance tests* IPGTT and IPITT were performed on conscious mice after overnight fast. A 20% glucose solution (2g of glucose/kg of body weight) or insulin (0.75 mU/g of body weight) was administered intraperitoneally. Blood samples (~ 50-60 ul) were collected into tubes containing 10mM EDTA for

measurements of glycemia and insulin. Insulin levels were measured using an ELISA Kit (Millipore).

*Triglyceride content* Triglyceride content in mice sera and liver extracts were performed using a triglyceride kit (BioVision) according to the manufacturer's instructions.

*Triglyceride lipase activity* Triglyceride lipase activity assay was performed as described previously in [20] on visceral fat extracts of 22 weeks HFD fed-mice.

*GCMS* Free fatty acids extracted from approximately 20 mg visceral fat tissue from *wt* and *G0S2<sup>-/-</sup>* mice on chow diet were measured using gas chromatography coupled to mass spectrometry. Folch extraction [20] was performed followed by a series of acid-base extractions. The final extraction was evaporated to dryness under nitrogen gas. The dried samples were then dissolved in anhydrous pyridine and transferred to autoinjector vials where 70  $\mu$ l of MTBSTFA (N-Methyl-N-tert-butyltrimethylsilyltrifluoroacetamide, Sigma) were added. Samples were heated at 70°C for 1 hour and were then loaded into the GC-MS machine for fatty acid analysis. Responses were normalized to the internal standard D27-myristic acid and were expressed per mg tissue.



## Supplementary figure Legends

**Fig. S1** Characterization of  $G02^{-/-}$  mice. (A) A picture of *wt* (left) and  $G0S2$  knockout mice (Right) on 22 weeks HFD. (B) raw data of mice body weight both on chow and 22-week HFD.

**Fig. S2** FFA profile in *wt* and  $G0S2^{-/-}$  visceral fat. Lipid extracts were subjected to gas chromatography coupled to mass spectrometry analysis. Data are expressed as means  $\pm$  SEM. n = 6 per genotype.

**Fig. S3** Expression levels of key lipolytic genes. mRNA levels of ATGL, HSL and CGI-58 in visceral fat of 22-week HFD-fed mice measured by quantitative real time-PCR and were normalized to cyclophilin.

**Fig. S4** Effects of  $G0S2$  deletion on glucose homeostasis. Blood glucose levels during IPGTT in fasted *wt* and *knockout* female mice on (A) chow diet and (B) HFD. Blood glucose levels during IPITT in fasted *wt* and *knockout* female mice on (C) chow diet and (D) HFD. (E) Insulin levels measured during IPGTT on male mice. Values represent means  $\pm$  SEM. n= 6 for *wt* and 9 for *knockout* mice on chow diet; n= 6 for *wt* and 10 for *knockout* mice on HFD.

**Fig. S5** Expression levels of lipases and UCP1 in BAT from mice fed either chow or 22-week HFD (A) a representative western blot of HSL, ATGL and UCP1 done on BAT extracts from chow and HFD mice. (B, C) Quantitation of protein levels of ATGL and UCP1 normalized to calnexin. (D) mRNA levels of ATGL and UCP1 in BAT of mice on HFD. n=4 per genotype for western blot on each diet condition; and n=5 per genotype for quantitative RT-PCR.
